## RESEARCH ARTICLE

# The fission yeast cytokinetic ring component Fic1 promotes septum formation

Anthony M. Rossi, K. Adam Bohnert\* and Kathleen L. Gould<sup>‡</sup>

## ABSTRACT

In *Schizosaccharomyces pombe*, septum formation is coordinated with cytokinetic ring constriction but the mechanisms linking these events are unclear. In this study, we explored the role of the cytokinetic ring component Fic1, first identified by its interaction with the F-BAR protein Cdc15, in septum formation. We found that the *fic1* phospho-ablating mutant, *fic1-2A*, is a gain-of-function allele that suppresses *myo2-E1*, the temperature-sensitive allele of the essential type-II myosin, *myo2*. This suppression is achieved by the promotion of septum formation and required Fic1's interaction with the F-BAR proteins Cdc15 and Imp2. Additionally, we found that Fic1 interacts with Cyk3 and that this interaction was likewise required for Fic1's role in septum formation. Fic1, Cdc15, Imp2, and Cyk3 are the orthologs of the *Saccharomyces cerevisiae* ingression progression complex, which stimulates the chitin synthase Chs2 to promote primary septum formation. However, our findings indicate that Fic1 promotes septum formation and cell abscission independently of the *S. pombe* Chs2 ortholog. Thus, while similar complexes exist in the two yeasts that each promote septation, they appear to have different downstream effectors.

**KEY WORDS:** Fission yeast, Cytokinetic ring, Cytokinesis, Septation, Myosin II

## INTRODUCTION

Cytokinesis is the final process in the cell cycle which creates two independent daughter cells. Many eukaryotic organisms use an actin-myosin structure known as the cytokinetic ring (CR) to mark the plane of cell division and to drive membrane ingression (reviewed in Cheffings et al., 2016; Mangione and Gould, 2019). In organisms with cell walls, such as *Schizosaccharomyces pombe* and *Saccharomyces cerevisiae*, the CR alone is insufficient for cytokinesis (Jochova et al., 1991; Munoz et al., 2013; Proctor et al., 2012; Ramos et al., 2019; Schmidt et al., 2002). These organisms require the formation of a septum coupled to CR constriction to drive cell abscission (Cortés et al., 2007, 2015; Jochova et al., 1991; Proctor et al., 2012; Schmidt et al., 2002).

Yeast septa are trilaminar structures composed of a primary septum flanked by secondary septa (Humbel et al., 2001; Wloka and Bi, 2012). In *S. pombe* and *S. cerevisiae*, CR constriction promotes

septation perpendicular to the cell cortex (Cortés et al., 2002, 2007; Johnson et al., 1973; Roncero et al., 2016; Schmidt et al., 2002). In *S. cerevisiae* the chitin synthase Chs2 polymerizes N-acetylglucosamine to form the primary septum (Sburlati and Cabib, 1986; Shaw et al., 1991; Silverman et al., 1988). In contrast, in *S. pombe* it is the glucan synthases Bgs1 and Ags1 that polymerize linear- $\beta(1,3)$ glucans and  $\alpha(1,3)$ glucans, respectively, to form the primary septum (Cortés et al., 2002, 2007, 2015, 2012).

*S. cerevisiae* Chs2 and septum formation are stimulated by a protein complex within the CR named the ingression progression complex (IPC), comprised of the ingression protein Inn1, the F-BAR protein Hof1, and Cyk3 (Devrekanli et al., 2012; Nishihama et al., 2009; Sanchez-Diaz et al., 2008). Analogous proteins exist in *S. pombe*. Specifically, *S. pombe* Fic1, Cdc15/Imp2, and Cyk3 are the orthologs of Inn1, Hof1, and Cyk3, respectively (Demeter and Sazer, 1998; Fankhauser et al., 1995; Pollard et al., 2012; Roberts-Galbraith et al., 2009). Fic1 was identified in a yeast-two hybrid screen using the SH3 domain of Cdc15 as bait and directly interacts with Cdc15 and Imp2 (Ren et al., 2015; Roberts-Galbraith et al., 2009). *S. pombe* Cyk3 was identified based on sequence similarity to *S. cerevisiae* Cyk3 and has been found to co-immunoprecipitate with Fic1 (Bohnert and Gould, 2012; Roberts-Galbraith et al., 2009). However, it is unknown if these *S. pombe* proteins cooperate to promote primary septum formation similarly to the IPC.

We previously found that Fic1 is phosphorylated on two sites by multiple kinases (Bohnert et al., 2020). Preventing phosphorylation at these sites produces defects in the establishment of normal cell polarity. Here, we pursued the observation that the *fic1* phospho-ablating mutant, *fic1-2A*, also suppressed the *myo2-E1* temperature-sensitive allele of the essential type-II myosin Myo2 (Balasubramanian et al., 1998; Kitayama et al., 1997). The inability of *myo2-E1* cells to form a functional CR to guide septum formation prevents cytokinesis and leads to cell death (Balasubramanian et al., 1998). Time-lapse microscopy showed that *fic1-2A* suppressed *myo2-E1* by promoting septum formation and daughter cell abscission and that cells lacking *fic1* exhibited significant delays in septation. We determined that the ability of *fic1-2A* to suppress *myo2-E1* required its interactions with Cyk3, Cdc15, and/or Imp2 but not Chs2. This work revealed that *S. pombe*'s IPC analogs interact to promote septum formation through a mechanism that is functionally divergent from the IPC in *S. cerevisiae*.

## RESULTS

### Fic1 phospho-ablating mutant suppresses *myo2-E1*

To determine if Fic1's phosphorylation state impacts cytokinesis, we took a genetic approach and probed interactions between *fic1* phosphomutants and deletions or temperature-sensitive alleles of genes involved in actin dynamics (*cdc12*), septum formation (*sid2*, *bgs1*, and *bgs4*), and CR constriction (*cdc4* and *myo2*) (Fig. S1A). From this screen we observed one significant interaction: *fic1*'s phospho-ablating mutant, *fic1-2A*, suppressed *myo2-E1* (Fig. 1A,B

Department of Cell and Developmental Biology, Vanderbilt University School of Medicine, Nashville, TN 37240, USA.

\*Present address: Department of Biological Sciences, Louisiana State University, Baton Rouge, LA 70803, USA.

<sup>‡</sup>Author for correspondence (kathy.gould@vanderbilt.edu)

 A.M.R., 0000-0003-3787-8573; K.L.G., 0000-0002-3810-4070

This is an Open Access article distributed under the terms of the Creative Commons Attribution License (<https://creativecommons.org/licenses/by/4.0>), which permits unrestricted use, distribution and reproduction in any medium provided that the original work is properly attributed.

Received 3 April 2023; Accepted 19 April 2023

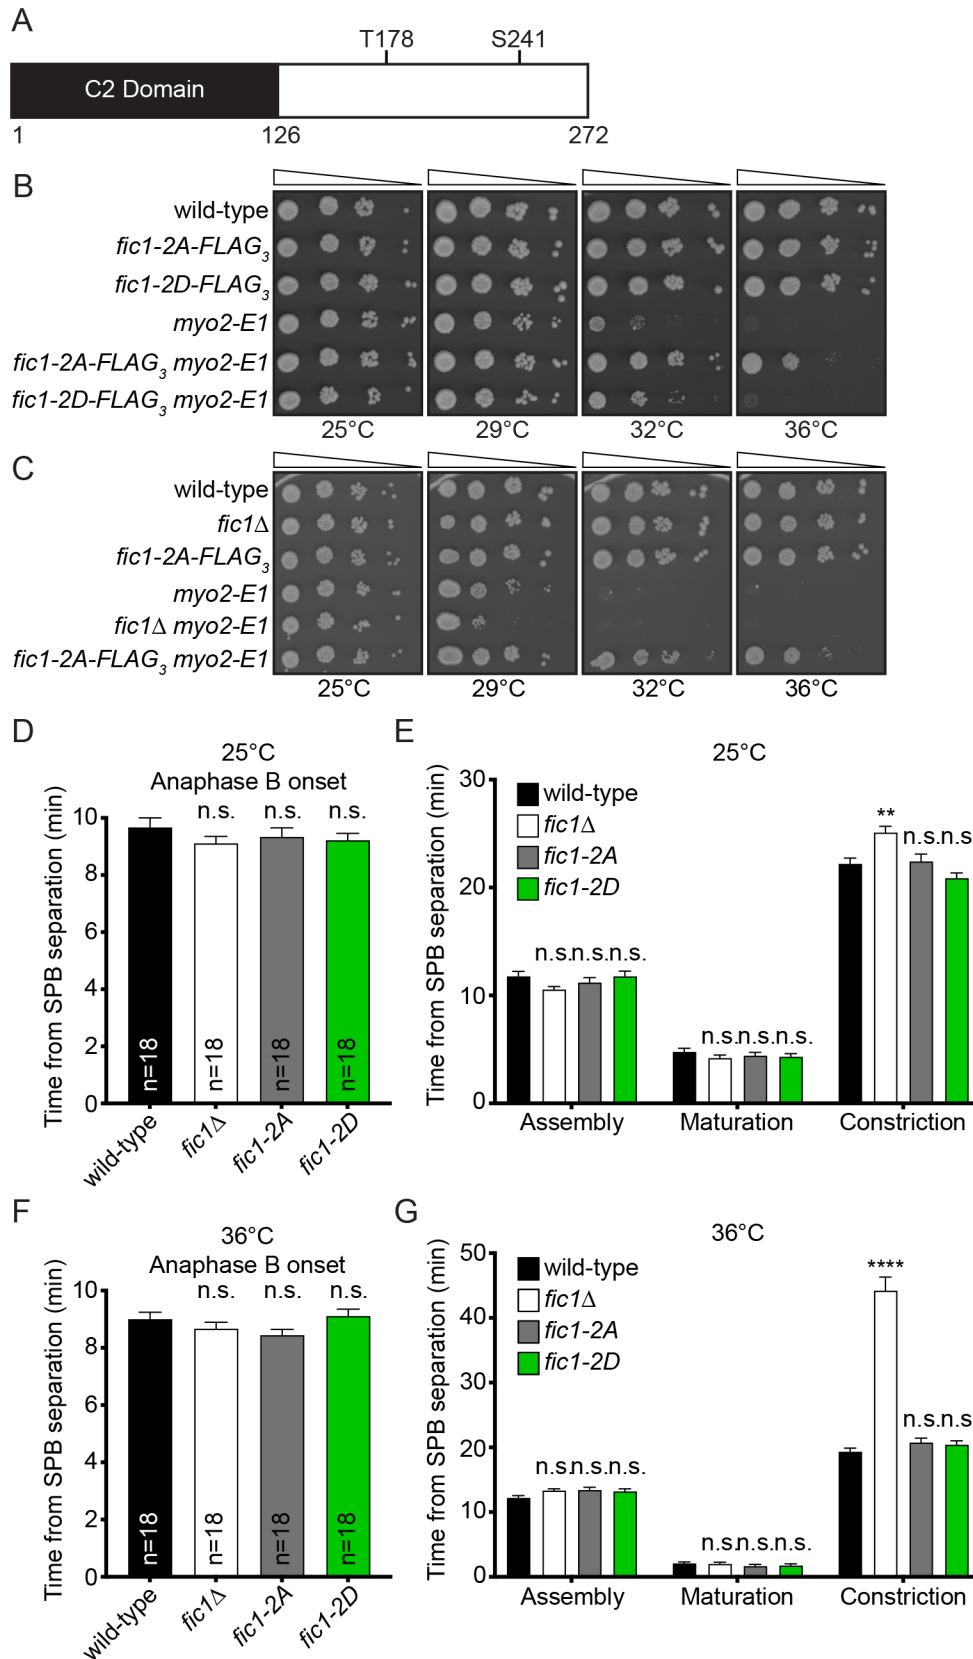

**Fig. 1. *fic1-2A* suppresses *myo2-E1*.** (A) Schematic of Fic1 with domain boundaries and phosphorylation sites indicated. Drawn to scale. (B,C) Ten-fold serial dilutions of the indicated strains were spotted on YE agar media and incubated at the indicated temperatures for 3-5 days. (D-G) Quantification of timing of anaphase B (D,F) and CR assembly, maturation, and constriction (E,G) for each strain at the indicated temperatures. *n*, number of cells analyzed. Data are presented as mean±s.e.m. \*\*\*\**P*≤0.0001, \*\**P*≤0.01, n.s., not significant, one-way ANOVA.

and Fig. S1A). *myo2-E1* is a temperature-sensitive allele of the essential type-II myosin, *myo2*, that inhibits Myo2's activity and produces non-constricting CRs at the restrictive temperature (Balasubramanian et al., 1998; Palani et al., 2017, 2018). Without

CR constriction, cell wall accumulates at the division site but does not form a septum (Balasubramanian et al., 1998; Palani et al., 2017, 2018; Ramos et al., 2019). Interestingly, *fic1Δ* did not suppress *myo2-E1* and no genetic interaction was observed between *fic1-2D*

and *myo2-E1* (Fig. 1B,C). This suggests *fic1-2A* is a gain-of-function allele, but whether this gain in function is due to alterations to Fic1's phosphorylation state is unclear. The individual phospho-ablating *fic1* mutants only partially suppressed *myo2-E1*, and none of the *fic1* phosphomutants were temperature-sensitive (Fig. S1B,C). We then pursued the underlying mechanisms behind *myo2-E1*'s suppression to gain insight into the cytokinetic roles of Fic1, a CR protein of enigmatic function.

### ***fic1-2A* cells exhibit similar CR dynamics compared to wild-type cells**

We postulated that *myo2-E1* suppression by *fic1-2A* could be achieved by altering CR dynamics. *fic1-2A* could provide additional time for proper glucan synthase localization by prolonging CR maturation and/or constriction. Glucan synthases are trafficked to the site of cell division and localize diffusely on the cortex (Cortés et al., 2002; Hoya et al., 2017; Katayama et al., 1999; Mulvihill et al., 2006; Ramos et al., 2019). As the CR constricts the glucan synthases coalesce into a ring concentric with the CR, Bgs1 is activated, and primary septum formation begins (Ramos et al., 2019). By providing additional time for glucan synthase ring formation by prolonging CR maturation and/or constriction *fic1-2A* could effectively promote septum formation. Alternatively, *fic1-2A* could increase the rate of CR constriction, which could allow *fic1-2A* to suppress *myo2-E1* by restoring the contractile function of the CR and septum formation.

To test these possibilities, we performed live-cell time-lapse imaging at 25°C and 36°C of wild-type, *fic1Δ*, *fic1-2A*, and *fic1-2D* cells containing a CR marker, *rlc1-mNG*, to monitor CR dynamics and a spindle pole body (SPB) marker, *sid4-GFP*, to monitor mitotic progression (Chang and Gould, 2000; Naqvi et al., 2000). The timing of anaphase B onset was similar between all strains at both temperatures (Fig. 1D,F), as was the timing of CR assembly and CR maturation (Fig. 1E,G). The timing of CR constriction was similar between wild-type, *fic1-2A*, and *fic1-2D* cells at both temperatures indicating that Fic1 phosphostate does not appreciably affect CR dynamics (Fig. 1E,G). However, *fic1Δ* took longer, an average of 25.1±0.6 and 44.2±2.1 min at 25°C and 36°C, respectively, whereas wild-type cells took 22.2±0.5 and 19.3±0.6 min at 25°C and 36°C, respectively (Fig. 1E,G). Delayed CR constriction in *fic1Δ* but not *fic1-2A* suggests that prolonging CR constriction is not how *fic1-2A* suppresses *myo2-E1*. Rather, because the rate of CR constriction is linked to the rate of septum deposition (Proctor et al., 2012; Ramos et al., 2019), the delay in CR constriction of *fic1Δ* suggests that Fic1 promotes septation and that the *fic1-2A* allele may enhance this function.

### ***fic1-2A myo2-E1* cells can complete cytokinesis**

We next probed this possibility for Fic1 function that would be analogous to Inn1 in *S. cerevisiae* (Sanchez-Diaz et al., 2008). We performed time-lapse imaging at 36°C with wild-type, *fic1-2A*, *myo2-E1*, and *fic1-2A myo2-E1* cells expressing the membrane marker LactC2-GFP, to monitor membrane ingression, and the SPB marker Sad1-GFP, to monitor mitotic progression (Curto et al., 2014; Hagan and Yanagida, 1995). The kinetics of septation were measured by timing membrane ingression and daughter cell abscission beginning from SPB separation at the onset of mitosis. The timing of anaphase B onset was similar between all genotypes (Fig. 2A,B). The initiation of membrane ingression was similar between wild-type and *fic1-2A* cells, averaging 14.9±0.4 and 16.2±0.3 min, respectively (Fig. 2A,C). However, both *myo2-E1* and *fic1-2A myo2-E1* cells exhibited delays in the initiation of

membrane ingression compared to wild-type, averaging 28.4±1.0 and 28.8±1.9 min, respectively (Fig. 2A,C). Daughter cell separation was completed at similar times in the wild-type and *fic1-2A* cells, averaging 40.6±0.6 and 43.1±0.6 min, respectively (Fig. 2A,D). None of the *myo2-E1* daughter cells separated, but 7 out of the 22 imaged *fic1-2A myo2-E1* daughter cells took an average time of 117.9±20.2 min to separate (Fig. 2A,D). The ability of some *fic1-2A myo2-E1* cells to complete membrane ingression and abscission is consistent with the idea that Fic1-2A enhances septum formation.

### **Fic1 directly interacts with Cyk3's SH3 domain**

Because the involvement of Fic1 in promoting septation was reminiscent of the role of *S. cerevisiae*'s IPC (Devrekanli et al., 2012; Nishihama et al., 2009; Sanchez-Diaz et al., 2008), we asked whether Fic1's interactions with Cdc15 and Imp2 were required for *myo2-E1* suppression. Fic1 binds the SH3 domains of the F-BAR proteins Cdc15 and Imp2 (Roberts-Galbraith et al., 2009) through the P254,257 PxxP motif, and the *fic1-P257A* mutation, which disrupts Fic1's interactions with Cdc15 and Imp2 (Bohnert and Gould, 2012), prevented *fic1-2A*'s suppression of *myo2-E1* (Fig. 3A,B). These data suggest that Fic1's interaction with Cdc15 and Imp2 are required for *fic1-2A*'s suppression of *myo2-E1* and thus, Fic1's role in promoting septum formation.

We next asked if *S. pombe* Cyk3 was required for *fic1-2A*'s suppression of *myo2-E1*. Indeed, *cyk3Δ* prevented *fic1-2A* from suppressing *myo2-E1* (Fig. 3C). We then aimed to determine if Cyk3 bound Fic1 through an SH3-PxxP interface, similarly to Cyk3 and Inn1 in *S. cerevisiae* (Nishihama et al., 2009) (Fig. 3D). To test this, we generated recombinant Cyk3-SH3-GST and as a negative control, Cyk3-SH3-W43S-GST. Based on SH3 domain homology, the W43S substitution is predicted to disrupt Cyk3-SH3's ability to bind PxxP motifs (Saksela and Permi, 2012). Immobilized Cyk3-SH3-GST purified Fic1-FLAG<sub>3</sub> from lysates of *S. pombe* arrested by *cps1-191*, a temperature-sensitive allele of *bgs1*, which allows CRs to form but prevents primary septum deposition (Liu et al., 1999), but Cyk3-W43S-SH3-GST did not (Fig. 3E). Finally, we found that Fic1-MBP directly bound Cyk3-SH3-GST indicating that Cyk3-SH3 directly binds Fic1 (Fig. 3F).

To verify that at least one of Fic1's 11 PxxP motifs was necessary for interaction with Cyk3's SH3 domain, we generated recombinant Fic1-MBP with every PxxP motif mutated to AxxA, referred to as Fic1-11AxxA-MBP. As predicted, Fic1-11AxxA-MBP did not bind Cyk3-SH3-GST or Cyk3-W43S-SH3-GST (Fig. S2A). To identify which PxxP motif was required for the interaction, we generated Fic1-MBP fusion proteins with each individual AxxA mutation. Fic1-P174,177A-MBP and Fic1-P176,179A-MBP exhibited reduced binding to Cyk3-SH3-GST compared to Fic1-MBP (Fig. 3G,H). Because these are distinct from the PxxP motif involved in binding Cdc15 and Imp2, Fic1 might be able to bind Cyk3 and Cdc15 or Imp2 simultaneously (Bohnert and Gould, 2012) to form an analog of the IPC. Indeed, molecular modeling using ColabFold predicted that Fic1 could simultaneously bind the SH3 domains of Cdc15 and Cyk3 (Fig. 3I and Fig. S2B) (Jumper et al., 2021; Mirdita et al., 2022).

Because the Fic1-2A mutant eliminates phosphorylation on T178, we wondered whether disrupting the prolines required for Cyk3 binding around T178 might alter Fic1's phosphorylation status. We were especially cognizant of this possibility because T178 can be phosphorylated *in vitro* by CDK, a proline-directed kinase (Bohnert et al., 2020). To examine whether these proline mutations affected Fic1 phosphorylation *in vivo*, we analyzed the

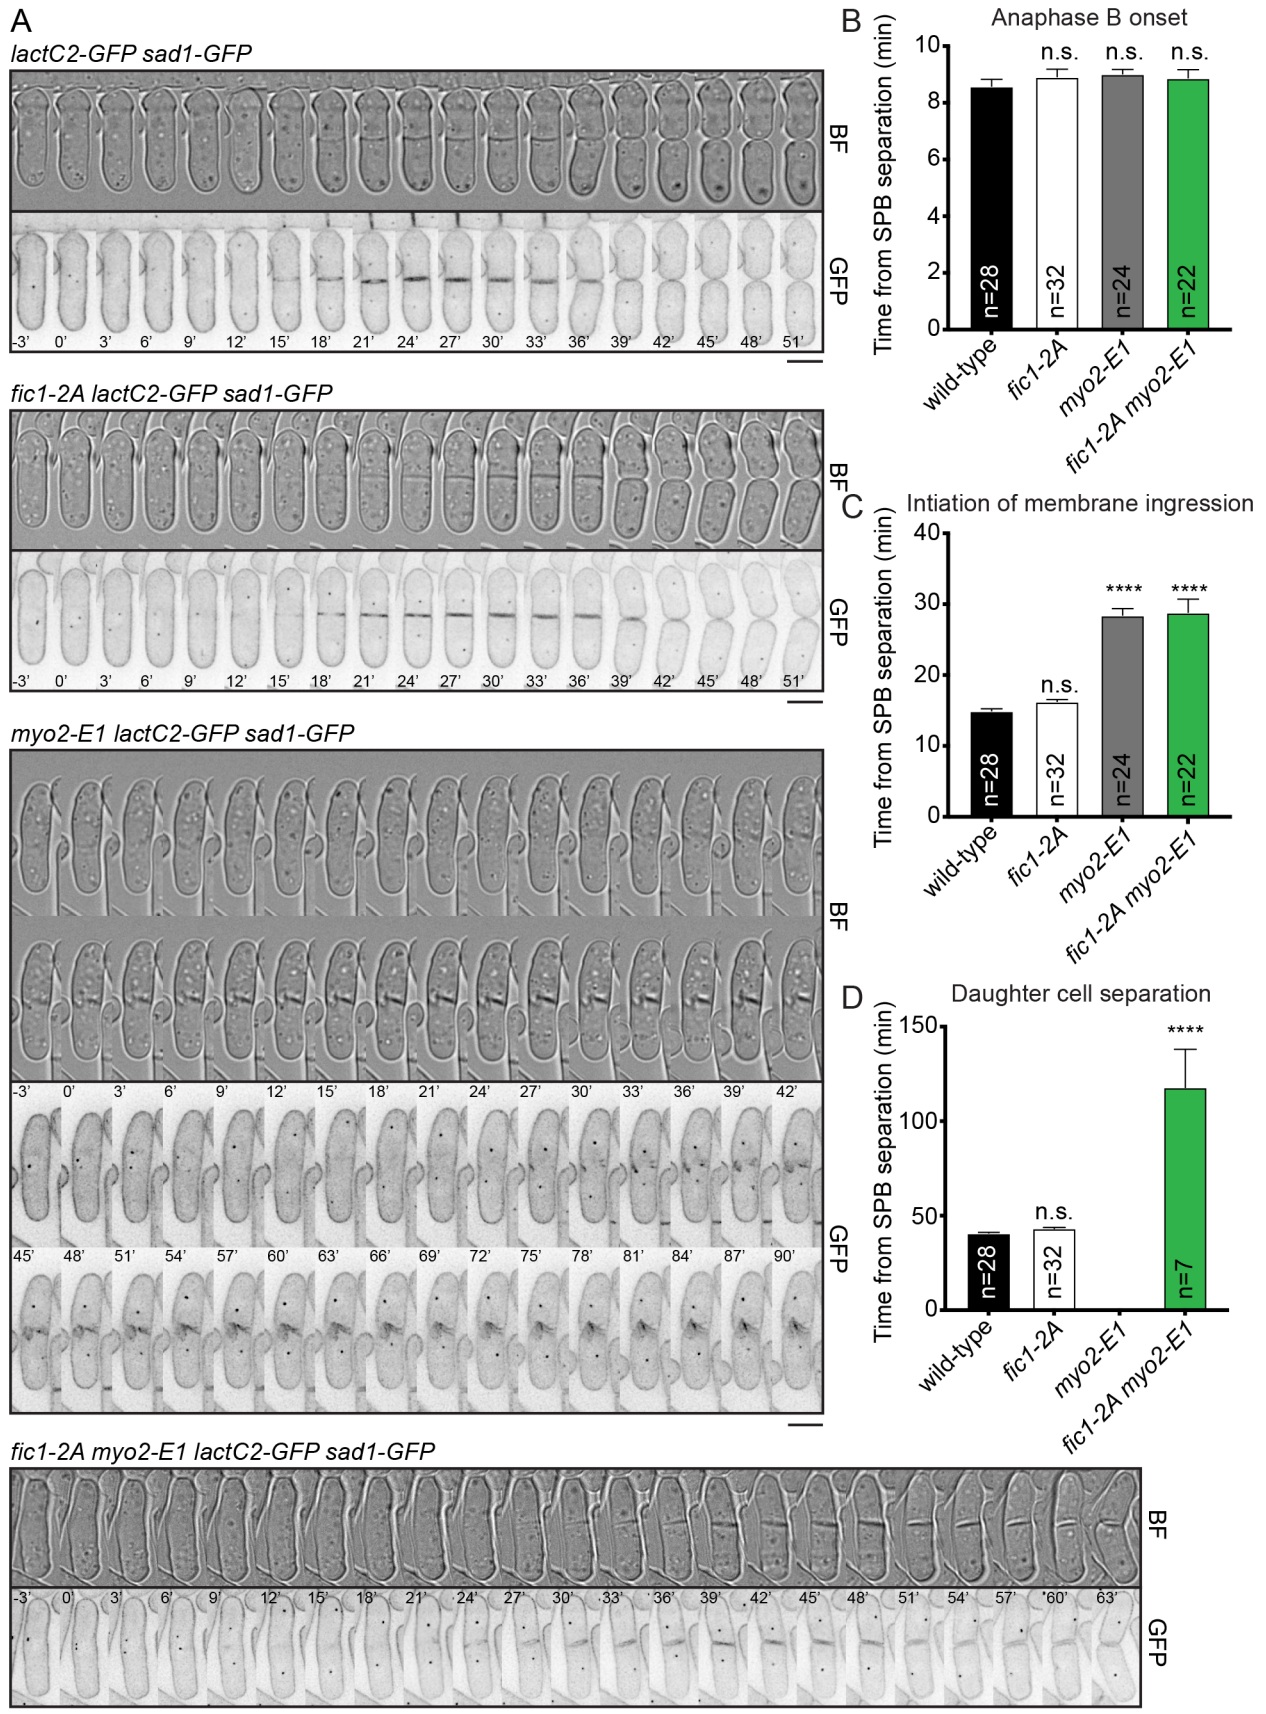

Fig. 2. See next page for legend.

**Fig. 2. *fic1-2A myo2-E1* cells can achieve membrane ingression and cell separation at *myo2-E1*'s restrictive temperature.** (A) Representative images of live-cell time-lapse movies from the indicated strains at 36°C. Images were acquired every 3 min. Scale bar: 5 µm. (B-D) Quantification of timing of anaphase B (B), initiation of membrane ingression (C), and completion of daughter cell separation (D) for each strain. Anaphase B onset was defined as the period from the separation of the SPBs to the initiation of SPB segregation towards opposite cell poles. CR assembly was defined as the period from the separation of the SPBs to the coalescence of cytokinetic nodes into a ring. CR maturation was defined as the period from the completion CR assembly to the initiation of CR contraction. CR constriction was defined as the period from CR contraction to the disappearance of the *rlc1-mNG* from the site of division. *n*, number of cells analyzed. Data are presented as mean±s.e.m. \*\*\*\**P*≤0.0001, n.s., not significant, one-way ANOVA.

gel mobilities of Fic1-P174,177A and Fic1-P176,179A. Fic1-FLAG<sub>3</sub> migrates as four bands. The top band represents dual phosphorylation at T178 and S241, the two intermediate bands are singly phosphorylated at T178 or S241, and the fastest migrating form is not phosphorylated (Bohnert et al., 2020). As predicted, Fic1-P176,179A formed only two bands, consistent with a loss of T178 phosphorylation (Fig. S2C) (Bohnert et al., 2020). Interestingly, Fic1-P174,177A displayed the wild-type pattern of phosphorylation suggesting that it could be used to selectively test the role of Cyk3 binding to Fic1 in the suppression of *myo2-E1* (Fig. S2C). We found that *fic1-2A-P174,177A* did not suppress *myo2-E1* (Fig. S2D) and similarly, inactivation of the Cyk3-SH3 domain by the *cyk3-W43S* allele disrupted *fic1-2A*'s suppression of *myo2-E1* (Fig. S3A). Taken together, these results suggest Cyk3 is required for Fic1's roles in septum formation.

### Cyk3's SH3 domain and transglutaminase-like domain (TLD) are required for Fic1's roles in septum formation

In addition to its SH3 domain, Cyk3 has a central TLD within a larger cysteine protease-like domain (CPD), which has been implicated in Cyk3's function but not thought to have enzymatic activity (Fig. 3D) (Pollard et al., 2012). To determine if Cyk3's TLD is required for *fic1-2A*'s suppression of *myo2-E1*, we inactivated the TLD through the previously established H577A mutation (Pollard et al., 2012) and found that this mutation also disrupted *fic1-2A*'s suppression of *myo2-E1* (Fig. S3B). To ensure that *cyk3-W43S* and *cyk3-H577A* were not disrupting *fic1-2A*'s suppression by destabilizing Cyk3 or by preventing Cyk3's localization to the CR, we measured the fluorescence intensity of GFP fusion proteins Cyk3-W43S and Cyk3-H577A. We found that both alleles had similar CR and whole-cell fluorescence as Cyk3-GFP (Fig. S3C-E), demonstrating these alleles were stably expressed and localized normally. Additionally, we found that both Cyk3-W43S and Cyk3-H577A co-immunoprecipitated with Cdc15 from lysates of cells arrested in prometaphase by the *nda3-KM311* cold-sensitive beta-tubulin allele as Cyk3 does (Fig. S3F) (Bohnert and Gould, 2012; Roberts-Galbraith et al., 2010).

### Fic1 and Cyk3 function independently of Chs2

*S. cerevisiae* Cyk3's TLD stimulates Chs2 (Foltman et al., 2016; Nishihama et al., 2009). While *S. pombe*'s septum lacks chitin, *S. pombe* does have an orthologous protein to *S. cerevisiae*'s Chs2 with the same name but lacking catalytic activity (Horisberger et al., 1978; Martin-Garcia et al., 2003; Matsuo et al., 2004; Sietsma and Wessels, 1990). *S. pombe* Chs2 possibly influences septum formation indirectly because, like *fic1Δ* and *cyk3Δ* cells, *chs2Δ*

cells display delays in CR constriction (Martin-Garcia and Valdivieso, 2006). In the cases of *fic1Δ* and *cyk3Δ*, CR constriction delays correlate with a postponement in the onset of bipolar growth, also known as new end take-off (NETO), and a transition to invasive pseudohyphal growth (Bohnert and Gould, 2012). If Chs2 acts downstream of Fic1 and Cyk3 we would expect that *chs2Δ* cells to also exhibit NETO defects and invasive pseudohyphal growth. We analyzed bipolar growth establishment in *chs2Δ*, *fic1Δ*, *cyk3Δ*, and combination *fic1Δ chs2Δ*, *cyk3Δ chs2Δ*, and *fic1Δ cyk3Δ chs2Δ* mutants and found that interphase cells of each indicated genotype had an increase in cells growing from only one end (monopolar) compared to wild-type (Fig. 4A). However, *chs2Δ* cells did not exhibit polarity defects at the time of septation or invasive pseudohyphal growth (Fig. 4B,C). Further, deletion of *chs2* did not disrupt *fic1-2A*'s suppression of *myo2-E1* and surprisingly, *chs2Δ* independently suppressed *myo2-E1* (Fig. 4D). These data together indicate that Chs2 does not act downstream of Fic1 and Cyk3 in septation. In accord, ColabFold did not predict an interaction between Cyk3's CPD and Chs2 in *S. pombe*, and even the predicted interaction between Cyk3's CPD and Chs2 in *S. cerevisiae* was weak (Fig. 4E-H) (Jumper et al., 2021; Mirdita et al., 2022).

### DISCUSSION

Fic1 is a CR component that supports proper CR constriction and disassembly, which influences growth polarity establishment in the subsequent cell cycle (Bohnert and Gould, 2012; Roberts-Galbraith et al., 2009). Fic1's role in cell polarity requires dynamic phosphorylation of two residues within its proline-rich C-terminus, a region that localizes Fic1 to the CR and supports its interactions with the SH3 domains of Cdc15 and Imp2 (Bohnert and Gould, 2012; Roberts-Galbraith et al., 2009). We presented evidence here to suggest that Fic1 promotes septum formation. This was revealed by the ability of the *fic1-2A* phospho-ablating allele to suppress *myo2-E1*. This suppression required Fic1's interactions with the SH3 domains of Cdc15 and/or Imp2 as well as a newly defined interaction with Cyk3's SH3 domains. These interactions were reminiscent of the IPC in *S. cerevisiae*, which promotes septum formation through Chs2 (Devrekanli et al., 2012; Nishihama et al., 2009; Sanchez-Diaz et al., 2008). While the interactions of orthologous proteins in *S. pombe* and *S. cerevisiae* were similar, we found that the Chs2 was not a downstream effector of the *S. pombe* protein network.

While these studies highlight Fic1's role in promoting septum formation, its downstream effectors remain elusive. Our finding that Chs2 is not the downstream effector aligns with previous findings demonstrating that the cell walls of vegetative *S. pombe* cells lack chitin (Horisberger et al., 1978; Sietsma and Wessels, 1990). Instead, glucan polymers comprise the septum, which makes the glucan synthases attractive potential downstream effectors to study (Cortés et al., 2002, 2007, 2015, 2012). We attempted to determine if Fic1's role in septation involved refining the localization of the glucan synthases at the site of cell division by performing time-lapse imaging of cells with GFP fusions of Bgs1, Bgs3, Bgs4, and Ags1 in wild-type, *fic1-2A*, *myo2-E1*, and *fic1-2A myo2-E1* cells at *myo2-E1*'s restrictive-temperature. Unfortunately, these fusion proteins disrupted *fic1-2A*'s suppression of *myo2-E1*. It is likely that the glucan synthase fusion proteins are slightly hypomorphic and that without full function of these cell wall enzymes *fic1-2A* is unable to suppress *myo2-E1*.

While we have considered the idea that Fic1 and Cyk3 promote septum formation through the glucan synthases, an anonymous

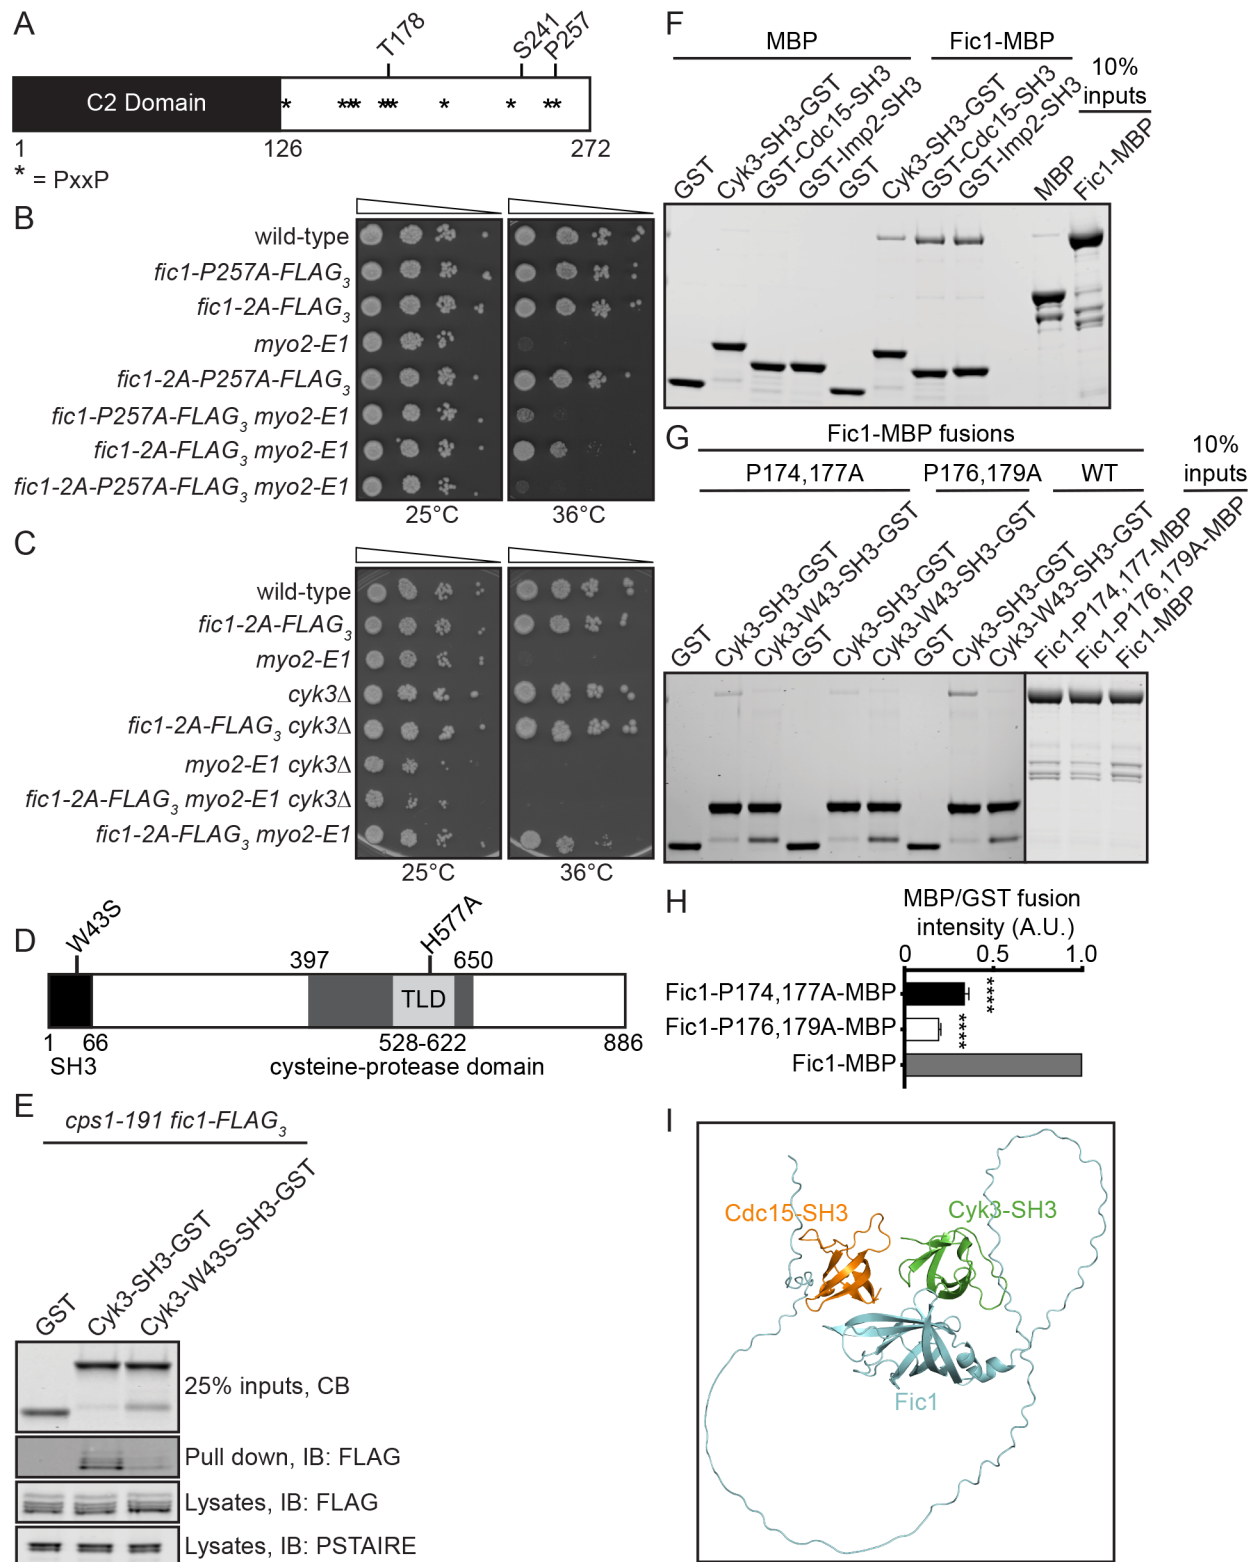

**Fig. 3. Cyk3-SH3 binds Fic1.** (A) Schematic of Fic1 with domain boundaries and phosphorylation sites indicated with amino acids numbers and PxxP motifs by asterisks. Drawn to scale. (B,C) Ten-fold serial dilutions of the indicated strains were spotted on YE agar media and incubated at the indicated temperatures for 3-5 days. (D) Schematic of Cyk3 drawn to scale. Domains and their boundaries and mutations within the domains indicated. (E) A portion of protein lysates from *cps1-191 fic1-FLAG<sub>3</sub>* cells was subjected to immunoblotting with anti-FLAG antibody and, as a loading control, anti-CDK (PSTAIRE) antibody. The remainder of the lysates was incubated with the indicated bead-bound GST recombinant proteins, of which a portion was detected by Coomassie Blue (CB) staining. Fic1 bound to the beads after washing was detected with anti-FLAG immunoblotting. Cells were shifted to 36°C for 3 h prior to lysis. (F,G) Coomassie Blue-stained SDS-PAGE gel of *in vitro* binding assays using the indicated recombinant proteins. (H) Quantification of the amount of soluble protein captured by bead-bound proteins, normalized to the amount of bead-bound protein. Data are presented as mean±s.e.m. \*\*\*\* $P \leq 0.0001$ , one-way ANOVA. (I) Molecular modeling predictions of interactions between Fic1 in cyan, Cyk3-SH3(aa1-66) in green, and Cdc15-SH3(aa867-927) in orange.

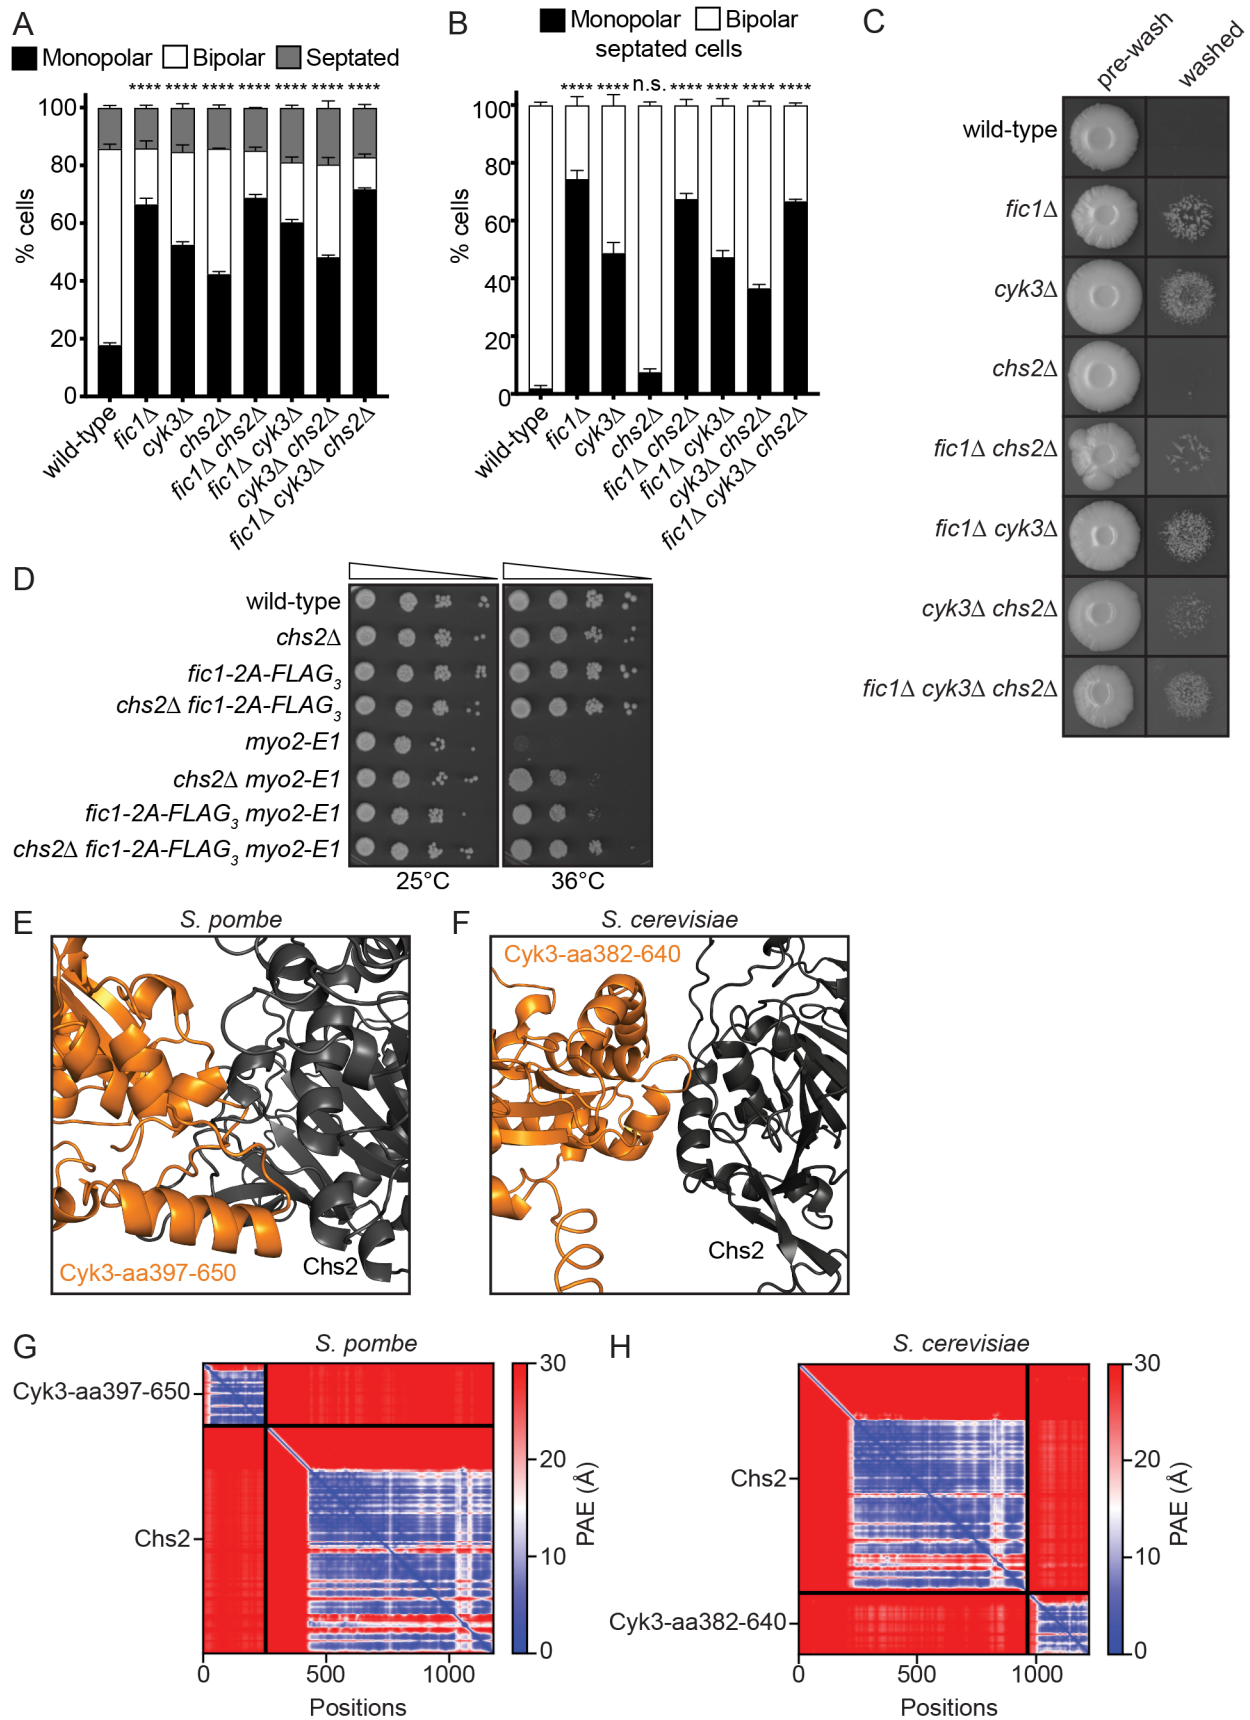

Fig. 4. See next page for legend.

**Fig. 4. Fic1 functions independently of Chs2.** (A,B) Quantification of growth polarity phenotypes for interphase (A) and septated cells (B) of the indicated genotypes. Data from three trials per genotype with  $n > 300$  cells for each trial are presented as mean  $\pm$  s.e.m. The percentage of monopolar cells between wild-type and other genotypes was compared. \*\*\*\* $P < 0.0001$ , n.s., not significant, two-way ANOVA with Dunnett's multiple-comparisons test. (C) Invasive growth assays of the indicated genotypes on 2% agar. Cells were spotted on YE agar media and incubated for 20 days at 29°C (top row, 'pre-wash'). Colonies were then rinsed under a stream of water and rubbed off (bottom row, 'washed'). (D) Ten-fold serial dilutions of the indicated strains were spotted on YE agar media and incubated at the indicated temperatures for 3-5 days. (E,F) Molecular modeling predictions of the interaction between Cyk3-aa397-650 in orange and Chs2 in grey in *S. pombe* (E) and Cyk3-aa382-640 in orange and Chs2 in grey in *S. cerevisiae* (F). (G,H) The predicted aligned error (PAE) map from the molecular modeling of the indicated proteins in *S. pombe* (G) and *S. cerevisiae* (H).

reviewer suggested that Fic1 and Cyk3 may promote septum formation by stimulating the exocyst complex given that there are two-stages of CR constriction, with the second more-rapid phase requiring exocyst function and the activation of the RhoGTPase Cdc42 by the RhoGEF Gef1 (Ramos et al., 2019). It is possible that *fic1-2A* promotes the initiation of the second stage of constriction, which could allow the first stage of constriction to be bypassed. It would therefore be interesting to probe for genetic interactions between the *fic1* phosphomutants, Gef1, and the exocyst complex to determine if Fic1 is involved in either of these pathways.

In conclusion, our results suggest that mutating the two Fic1 phosphorylation sites to alanine enhances Fic1's normal role in septation to allow *myo2-E1* suppression. Whether this is due to preventing Fic1 phosphorylation or changing Fic1 structure remains to be determined. However, Fic1's interactions with Cyk3, Cdc15, and/or Imp2 are required for this function and molecular modeling suggests Fic1 could simultaneously bind the SH3 domains of Cyk3 and Cdc15/Imp2 to form a complex similar to the *S. cerevisiae* IPC. Despite similar interactions to *S. cerevisiae*'s IPC, these proteins promote septum formation independent of Chs2 and it will be interesting to determine how they influence this critical aspect of fission yeast cell division.

## MATERIALS AND METHODS

### Yeast methods

*S. pombe* strains utilized in this study (Table S1) were cultured in yeast extract (YE) media (Moreno et al., 1991). Glutamate media was used for crosses (Moreno et al., 1991). *fic1*, *cyk3*, *sid4*, *rlc1*, and *sad1* were tagged endogenously at the 3' end of their open reading frames (ORFs) with *FLAG3::kan<sup>R</sup>*, *GFP::kan<sup>R</sup>*, *mNG::hyg<sup>R</sup>*, *V53::hyg<sup>R</sup>*, and/or *mCherry::nat<sup>R</sup>* using pFA6 cassettes as previously described (Bahler et al., 1998). G418 (100 µg/ml; Sigma-Aldrich, St. Louis, MO, USA), Hygromycin B (125 µg/ml; Invitrogen, Waltham, MA, USA), and Nourseothricin (125 µg/ml; Gold Biotechnology St. Louis, MO, USA) in YE media was used for selecting *kan<sup>R</sup>*, *hyg<sup>R</sup>*, and *nat<sup>R</sup>* cells, respectively. *mNG*, a YFP derivative from the lancelet *Branchiostoma lanceolatum*, was selected for imaging experiments because of its superior brightness (Shaner et al., 2013; Willet et al., 2015). A lithium acetate transformation method (Keeney and Boeke, 1994) was used for introducing tagging sequences, and endogenous integration of tags were verified by whole-cell PCR and/or microscopy. Introduction of tagged loci into other genetic backgrounds was accomplished using standard *S. pombe* mating, sporulation, and tetrad-dissection techniques. Fusion proteins were expressed from their endogenous locus under control of their native promoter unless otherwise indicated. For serial-dilution growth assays, cells were cultured in liquid YE at 25°C in a shaking incubator, four 1:10 serial dilutions starting at  $1.5 \times 10^6$  cells/ml were made, 2 µl of each dilution was spotted on YE agar, and cells were grown at the specified temperatures for 3-5 days. All spot assays were performed in triplicate and representative images are shown.

Mutants of *fic1* were expressed from the endogenous loci. To make *fic1* mutations, *fic1*<sup>+</sup> gDNA with 500 bp 5' and 3' flanks was inserted between BamHI and PstI sites of pIRT2 (Bohnert and Gould, 2012) and site-directed mutagenesis was used to introduce the desired mutations, which were confirmed by DNA sequencing. *fic1::ura<sup>+</sup>* was transformed with these pIRT2-*fic1* constructs, and stable integrants resistant to 1.5 g/L 5-fluoroorotic acid (5-FOA) (Thermo Fisher Scientific, Hampton, NH, USA) were isolated. The correct insertion site and mutations were confirmed by whole-cell PCR and DNA sequencing.

*cyk3* strains were made in a similar manner but pIRT2-*cyk3* (W43S, H577A, W43S, H577A) mutant plasmids were constructed from *cyk3* cDNA with 500 bp 5' and 3' flanks to allow these *cyk3* alleles to be verified by whole-cell PCR once integrated.

### Invasive growth assays

To assay pseudohyphal invasive growth, 5 µl containing a total of  $10^5$  cells were spotted on 2% YE agar and incubated at 29°C for 20 days. Colonies were subsequently placed under a steady stream of water and surface growth was wiped off using a paper towel, as described previously (Pohlmann and Fleig, 2010; Prevorsevsky et al., 2009).

### Microscopy

Live-cell imaging of *S. pombe* cells were acquired using one of the following: (1) a personal DeltaVision microscope system (Leica Microsystems, Wetzlar, Germany) that includes an Olympus IX71 microscope, 60× NA 1.42 PlanApo and 100× NA 1.40 UPlanSApo objectives, a pco.edge 4.2 sCMOS camera, and softWoRx imaging software or (2) a Zeiss Axio Observer inverted epifluorescence microscope with Zeiss 63X Oil (1.46 NA), a AxioCam 503 monochrome camera (Zeiss), and captured using Zeiss ZEN 3.0 (Blue edition) software. All cells were in log phase growth before temperature-sensitive shifts and/or live imaging. Time-lapse imaging was performed using an ONIX microfluidics perfusion system (CellASIC ONIX; EMD Millipore, Burlington, MA, USA). A suspension of 50 µl of  $40 \times 10^6$  cells/ml YE was loaded into Y04C plates for 5 s at 8 psi. YE media was flowed through the chamber at 5 psi throughout imaging.

Anaphase B onset was defined as the period from the separation of the SPBs to the initiation of SPB segregation towards opposite cell poles. CR assembly was defined as the period from the separation of the SPBs to the coalescence of the cytokinetic nodes into a clearly defined ring. CR maturation was defined as the period from the completion CR assembly to the initiation of CR contraction. CR constriction was defined as the period from CR contraction to the disappearance of the *rlc1-mNG* from the site of division.

Intensity measurements were made from non-deconvolved summed Z-projections of the images processed through ImageJ software (Schneider et al., 2012). For all intensity measurements, the background was subtracted by selecting a region of interest (ROI) in the same image in an area free of cells. The background raw intensity was divided by the area of the background, which was multiplied by the area of the measured object. This number was then subtracted from the intensity measurement of that object. Max intensity Z projections are shown in representative images.

To visualize birth scars by Calcofluor staining, cells were washed in PBS and then resuspended in PBS containing 5 µg/ml Calcofluor and allowed to incubate on ice for 30 min. Cells were then washed three times in PBS and images were acquired. Using the proximity of birth scars to cell ends, growth/morphology was categorized as one of the following: monopolar (i.e. growth on one end), bipolar (i.e. growth on both ends), monopolar and septated, or bipolar and septated. All cells stained with Calcofluor were grown to log phase at 25°C.

### Protein methods

Cells were lysed by bead disruption in NP-40 buffer in denaturing conditions as previously described (Gould et al., 1991). Immunoblot analysis of cell lysates and immunoprecipitates was performed using anti-FLAG (M2; Sigma-Aldrich, St. Louis, MO, USA), anti-PSTAIR Cdc2 (Sigma-Aldrich, St., Louis, MO, USA), anti-GFP (Roche, Indianapolis, IN,



USA), or anti-GFP (VUIC9H4) antibodies or serums raised against GST-Cdc15 (amino acids 1–405; VU326; Cocalico Biologicals, Stevens, PA, USA) as previously described (Bohnert et al., 2009). Cyk3-SH3-GST (aa1-66), Fic1-MBP, GST-Cdc15-SH3 (aa867-927), and GST-Imp2-SH3 (aa608-670) recombinant proteins and their variants were purified from *E. coli* using standard biochemistry techniques. *In vitro* binding assays were performed in 20 mM Tris (pH 7.4) and 150 mM NaCl and allowed to be incubated at 4°C for 1 h while nutating. The beads were washed three times with reaction buffer before performing SDS-PAGE and Coomassie staining. Affinity purifications using bead bound Cyk3-SH3-GST recombinant proteins and *S. pombe* lysate were performed by lysing cells in Cyk3 lysis buffer (50 mM Tris (pH 7.5), 150 mM NaCl, 1 mM EDTA, 50 mM NaF, 0.5% NP-40, 0.1% SDS, 1 mM DTT, 1 mM PMSF, 1.3 mM Benzamide, and cOmplete protease inhibitors (Roche, Indianapolis, IN, USA)). *S. pombe* lysates and Cyk3-SH3-GST recombinant proteins were incubated at 4°C for 1 h while nutating. The bead bound recombinant proteins were washed three times in the lysate buffer before SDS-PAGE and immunoblotting or Coomassie staining.

#### Acknowledgements

We are grateful to Yolanda Sánchez for providing strains. We thank Alaina Willet, Sierra Cullati, Kazutoshi Akizuki, and Jun-Song Chen for critical reading of the manuscript.

#### Competing interests

The authors declare no competing or financial interests.

#### Author contributions

Conceptualization: A.M.R., K.A.B., K.L.G.; Validation: A.M.R., K.A.B., K.L.G.; Formal analysis: A.M.R., K.A.B.; Investigation: A.M.R., K.A.B.; Resources: K.L.G.; Data curation: A.M.R., K.A.B.; Writing - original draft: A.M.R., K.L.G.; Writing - review & editing: A.M.R., K.A.B., K.L.G.; Visualization: A.M.R., K.A.B.; Supervision: K.L.G.; Project administration: K.L.G.; Funding acquisition: K.L.G.

#### Funding

A.M.R. was supported by a National Institutes of Health grant (T32 GM008554). This work was supported by National Institute of General Medical Sciences grant (R35 GM131799) to K.L.G. Deposited in PMC for immediate release.

#### Data availability

All relevant data can be found within the article and its supplementary information.

#### References

- Bahler, J., Wu, J. Q., Longtine, M. S., Shah, N. G., Mckenzie, A., 3rd, Steever, A. B., Wach, A., Philippsen, P. and Pringle, J. R. (1998). Heterologous modules for efficient and versatile PCR-based gene targeting in *Schizosaccharomyces pombe*. *Yeast* **14**, 943-951. doi:10.1002/(SICI)1097-0061(199807)14:10<943::AID-YEA292>3.0.CO;2-Y
- Balasubramanian, M. K., Mccollum, D., Chang, L., Wong, K. C., Naqvi, N. I., He, X., Sazer, S. and Gould, K. L. (1998). Isolation and characterization of new fission yeast cytokinesis mutants. *Genetics* **149**, 1265-1275. doi:10.1093/genetics/149.3.1265
- Bohnert, K. A. and Gould, K. L. (2012). Cytokinesis-based constraints on polarized cell growth in fission yeast. *PLoS Genet.* **8**, e1003004. doi:10.1371/journal.pgen.1003004
- Bohnert, K. A., Chen, J. S., Clifford, D. M., Vander Kooi, C. W. and Gould, K. L. (2009). A link between aurora kinase and Clp1/Cdc14 regulation uncovered by the identification of a fission yeast borealin-like protein. *Mol. Biol. Cell* **20**, 3646-3659. doi:10.1091/mbc.e09-04-0289
- Bohnert, K. A., Rossi, A. M., Jin, Q. W., Chen, J. S. and Gould, K. L. (2020). Phosphoregulation of the cytokinetic protein Fic1 contributes to fission yeast growth polarity establishment. *J. Cell Sci.* **133**, jcs244392. doi:10.1242/jcs.244392
- Chang, L. and Gould, K. L. (2000). Sid4p is required to localize components of the septation initiation pathway to the spindle pole body in fission yeast. *Proc. Natl. Acad. Sci. USA* **97**, 5249-5254. doi:10.1073/pnas.97.10.5249
- Cheffings, T. H., Burroughs, N. J. and Balasubramanian, M. K. (2016). Actomyosin ring formation and tension generation in eukaryotic cytokinesis. *Curr. Biol.* **26**, R719-R737. doi:10.1016/j.cub.2016.06.071
- Cortés, J. C., Ishiguro, J., Durán, A. and Ribas, J. C. (2002). Localization of the (1,3)beta-D-glucan synthase catalytic subunit homologue Bgs1p/Cps1p from fission yeast suggests that it is involved in septation, polarized growth, mating, spore wall formation and spore germination. *J. Cell Sci.* **115**, 4081-4096. doi:10.1242/jcs.00085
- Cortés, J. C., Konomi, M., Martins, I. M., Muñoz, J., Moreno, M. B., Osumi, M., Durán, A. and Ribas, J. C. (2007). The (1,3)beta-D-glucan synthase subunit Bgs1p is responsible for the fission yeast primary septum formation. *Mol. Microbiol.* **65**, 201-217. doi:10.1111/j.1365-2958.2007.05784.x
- Cortés, J. C., Sato, M., Muñoz, J., Moreno, M. B., Clemente-Ramos, J. A., Ramos, M., Okada, H., Osumi, M., Durán, A. and Ribas, J. C. (2012). Fission yeast Ags1 confers the essential septum strength needed for safe gradual cell abscission. *J. Cell Biol.* **198**, 637-656. doi:10.1083/jcb.201202015
- Cortés, J. C., Pujol, N., Sato, M., Pinar, M., Ramos, M., Moreno, B., Osumi, M., Ribas, J. C. and Pérez, P. (2015). Cooperation between Paxillin-like protein Pxl1 and Glucan synthase Bgs1 is essential for actomyosin ring stability and septum formation in fission yeast. *PLoS Genet.* **11**, e1005358. doi:10.1371/journal.pgen.1005358
- Curto, M. A., Sharifmoghadam, M. R., Calpena, E., De León, N., Hoya, M., Doncel, C., Leatherwood, J. and Valdivieso, M. H. (2014). Membrane organization and cell fusion during mating in fission yeast requires multipass membrane protein Ppm1. *Genetics* **196**, 1059-1076. doi:10.1534/genetics.113.159558
- Demeter, J. and Sazer, S. (1998). imp2, a new component of the actin ring in the fission yeast *Schizosaccharomyces pombe*. *J. Cell Biol.* **143**, 415-427. doi:10.1083/jcb.143.2.415
- Devrekanli, A., Foltman, M., Roncero, C., Sanchez-Diaz, A. and Labib, K. (2012). Inn1 and Cyk3 regulate chitin synthase during cytokinesis in budding yeasts. *J. Cell Sci.* **125**, 5453-5466. doi:10.1242/jcs.109157
- Fankhauser, C., Reymond, A., Cerutti, L., Utzig, S., Hofmann, K. and Simanis, V. (1995). The *S. pombe* cdc15 gene is a key element in the reorganization of F-actin at mitosis. *Cell* **82**, 435-444. doi:10.1016/0092-8674(95)90432-8
- Foltman, M., Molist, I., Arcones, I., Sacristan, C., Filali-Mounecef, Y., Roncero, C. and Sanchez-Diaz, A. (2016). Ingression progression complexes control extracellular matrix remodelling during cytokinesis in budding yeast. *PLoS Genet.* **12**, e1005864. doi:10.1371/journal.pgen.1005864
- Gould, K. L., Moreno, S., Owen, D. J., Sazer, S. and Nurse, P. (1991). Phosphorylation at Thr167 is required for *Schizosaccharomyces pombe* p34cdc2 function. *EMBO J.* **10**, 3297-3309. doi:10.1002/j.1460-2075.1991.tb04894.x
- Hagan, I. and Yanagida, M. (1995). The product of the spindle formation gene sad1+ associates with the fission yeast spindle pole body and is essential for viability. *J. Cell Biol.* **129**, 1033-1047. doi:10.1083/jcb.129.4.1033
- Horisberger, M., Vonlanthen, M. and Rosset, J. (1978). Localization of alpha-galactomannan and of wheat germ agglutinin receptors in *Schizosaccharomyces pombe*. *Arch. Microbiol.* **119**, 107-111. doi:10.1007/BF00964260
- Hoya, M., Yanguas, F., Moro, S., Prescianotto-Baschong, C., Doncel, C., De Leon, N., Curto, M. A., Spang, A. and Valdivieso, M. H. (2017). Traffic through the trans-golgi network and the endosomal system requires collaboration between exomer and clathrin adaptors in fission yeast. *Genetics* **205**, 673-690. doi:10.1534/genetics.116.193458
- Humbel, B. M., Konomi, M., Takagi, T., Kamasawa, N., Ishijima, S. A. and Osumi, M. (2001). In situ localization of beta-glucans in the cell wall of *Schizosaccharomyces pombe*. *Yeast* **18**, 433-444. doi:10.1002/yea.694
- Jochova, J., Rupes, I. and Streiblova, E. (1991). F-actin contractile rings in protoplasts of the yeast *Schizosaccharomyces pombe*. *Cell Biol. Int. Rep.* **15**, 607-610. doi:10.1016/0309-1651(91)90007-6
- Johnson, B. F., Yoo, B. Y. and Calleja, G. B. (1973). Cell division in yeasts: movement of organelles associated with cell plate growth of *Schizosaccharomyces pombe*. *J. Bacteriol.* **115**, 358-366. doi:10.1128/jb.115.1.358-366.1973
- Jumper, J., Evans, R., Pritzel, A., Green, T., Figurnov, M., Ronneberger, O., Tunyasuvunakool, K., Bates, R., Zidek, A., Potapenko, A. et al. (2021). Highly accurate protein structure prediction with AlphaFold. *Nature* **596**, 583-589. doi:10.1038/s41586-021-03819-2
- Katayama, S., Hirata, D., Arellano, M., Pérez, P. and Toda, T. (1999). Fission yeast alpha-glucan synthase Mok1 requires the actin cytoskeleton to localize the sites of growth and plays an essential role in cell morphogenesis downstream of protein kinase C function. *J. Cell Biol.* **144**, 1173-1186. doi:10.1083/jcb.144.6.1173
- Keeney, J. B. and Boeke, J. D. (1994). Efficient targeted integration at leu1-32 and ura4-294 in *Schizosaccharomyces pombe*. *Genetics* **136**, 849-856. doi:10.1093/genetics/136.3.849
- Kitayama, C., Sugimoto, A. and Yamamoto, M. (1997). Type II myosin heavy chain encoded by the myo2 gene composes the contractile ring during cytokinesis in *Schizosaccharomyces pombe*. *J. Cell Biol.* **137**, 1309-1319. doi:10.1083/jcb.137.6.1309
- Liu, J., Wang, H., Mccollum, D. and Balasubramanian, M. K. (1999). Drc1p/Cps1p, a 1,3-beta-glucan synthase subunit, is essential for division septum assembly in *Schizosaccharomyces pombe*. *Genetics* **153**, 1193-1203. doi:10.1093/genetics/153.3.1193
- Mangione, M. C. and Gould, K. L. (2019). Molecular form and function of the cytokinetic ring. *J. Cell Sci.* **132**, jcs226928. doi:10.1242/jcs.226928
- Martin-Garcia, R. and Valdivieso, M.-H. (2006). The fission yeast Chs2 protein interacts with the type-II myosin Myo3p and is required for the integrity of the actomyosin ring. *J. Cell Sci.* **119**, 2768-2779. doi:10.1242/jcs.02998

- Martin-Garcia, R., Durán, A. and Valdivieso, M. H. (2003). In *Schizosaccharomyces pombe* chs2p has no chitin synthase activity but is related to septum formation. *FEBS Lett.* **549**, 176-180. doi:10.1016/S0014-5793(03)00812-3
- Matsuo, Y., Tanaka, K., Nakagawa, T., Matsuda, H. and Kawamukai, M. (2004). Genetic analysis of chs1+ and chs2+ encoding chitin synthases from *Schizosaccharomyces pombe*. *Biosci. Biotechnol. Biochem.* **68**, 1489-1499. doi:10.1271/bbb.68.1489
- Mirdita, M., Schütze, K., Moriwaki, Y., Heo, L., Ovchinnikov, S. and Steinegger, M. (2022). ColabFold: making protein folding accessible to all. *Nat. Methods* **19**, 679-682. doi:10.1038/s41592-022-01488-1
- Moreno, S., Klar, A. and Nurse, P. (1991). Molecular genetic analysis of fission yeast *Schizosaccharomyces pombe*. *Methods Enzymol.* **194**, 795-823. doi:10.1016/0076-6879(91)94059-L
- Mulvihill, D. P., Edwards, S. R. and Hyams, J. S. (2006). A critical role for the type V myosin, Myo52, in septum deposition and cell fission during cytokinesis in *Schizosaccharomyces pombe*. *Cell Motil. Cytoskeleton* **63**, 149-161. doi:10.1002/cm.20113
- Munoz, J., Cortes, J. C., Sipiczki, M., Ramos, M., Clemente-Ramos, J. A., Moreno, M. B., Martins, I. M., Perez, P. and Ribas, J. C. (2013). Extracellular cell wall  $\beta(1,3)$ glucan is required to couple septation to actomyosin ring contraction. *J. Cell Biol.* **203**, 265-282. doi:10.1083/jcb.201304132
- Naqvi, N. I., Wong, K. C., Tang, X. and Balasubramanian, M. K. (2000). Type II myosin regulatory light chain relieves auto-inhibition of myosin-heavy-chain function. *Nat. Cell Biol.* **2**, 855-858. doi:10.1038/35041107
- Nishihama, R., Schreiter, J. H., Onishi, M., Vallen, E. A., Hanna, J., Moravcevic, K., Lippincott, M. F., Han, H., Lemmon, M. A., Pringle, J. R. et al. (2009). Role of Inn1 and its interactions with Hof1 and Cyk3 in promoting cleavage furrow and septum formation in *S. cerevisiae*. *J. Cell Biol.* **185**, 995-1012. doi:10.1083/jcb.200903125
- Palani, S., Chew, T. G., Ramanujam, S., Kamnev, A., Harne, S., Chapa, Y. L. B., Hogg, R., Sevugan, M., Mishra, M., Gayathri, P. et al. (2017). Motor activity dependent and independent functions of myosin II contribute to actomyosin ring assembly and contraction in *Schizosaccharomyces pombe*. *Curr. Biol.* **27**, 751-757. doi:10.1016/j.cub.2017.01.028
- Palani, S., Srinivasan, R., Zambon, P., Kamnev, A., Gayathri, P. and Balasubramanian, M. K. (2018). Steric hindrance in the upper 50 kDa domain of the motor Myo2p leads to cytokinesis defects in fission yeast. *J. Cell Sci.* **131**, jcs205625. doi:10.1242/jcs.205625
- Pohlmann, J. and Fleig, U. (2010). Asp1, a conserved 1/3 inositol polyphosphate kinase, regulates the dimorphic switch in *Schizosaccharomyces pombe*. *Mol. Cell Biol.* **30**, 4535-4547. doi:10.1128/MCB.00472-10
- Pollard, L. W., Onishi, M., Pringle, J. R. and Lord, M. (2012). Fission yeast Cyk3p is a transglutaminase-like protein that participates in cytokinesis and cell morphogenesis. *Mol. Biol. Cell* **23**, 2433-2444. doi:10.1091/mbc.e11-07-0656
- Prevorovsky, M., Stanurova, J., Puta, F. and Folk, P. (2009). High environmental iron concentrations stimulate adhesion and invasive growth of *Schizosaccharomyces pombe*. *FEMS Microbiol. Lett.* **293**, 130-134. doi:10.1111/j.1574-6968.2009.01515.x
- Proctor, S. A., Minc, N., Boudaoud, A. and Chang, F. (2012). Contributions of turgor pressure, the contractile ring, and septum assembly to forces in cytokinesis in fission yeast. *Curr. Biol.* **22**, 1601-1608. doi:10.1016/j.cub.2012.06.042
- Ramos, M., Cortes, J. C. G., Sato, M., Rincon, S. A., Moreno, M. B., Clemente-Ramos, J. A., Osumi, M., Perez, P. and Ribas, J. C. (2019). Two *S. pombe* septation phases differ in ingression rate, septum structure, and response to F-actin loss. *J. Cell Biol.* **218**, 4171-4194. doi:10.1083/jcb.201808163
- Ren, L., Willet, A. H., Roberts-Galbraith, R. H., Mcdonald, N. A., Feoktistova, A., Chen, J. S., Huang, H., Guillen, R., Boone, C., Sidhu, S. S. et al. (2015). The Cdc15 and Imp2 SH3 domains cooperatively scaffold a network of proteins that redundantly ensure efficient cell division in fission yeast. *Mol. Biol. Cell* **26**, 256-269. doi:10.1091/mbc.E14-10-1451
- Roberts-Galbraith, R. H., Chen, J. S., Wang, J. and Gould, K. L. (2009). The SH3 domains of two PCH family members cooperate in assembly of the *Schizosaccharomyces pombe* contractile ring. *J. Cell Biol.* **184**, 113-127. doi:10.1083/jcb.200806044
- Roberts-Galbraith, R. H., Ohi, M. D., Ballif, B. A., Chen, J. S., Mcleod, I., Mcdonald, W. H., Gygi, S. P., Yates, J. R., 3rd and Gould, K. L. (2010). Dephosphorylation of F-BAR protein Cdc15 modulates its conformation and stimulates its scaffolding activity at the cell division site. *Mol. Cell* **39**, 86-99. doi:10.1016/j.molcel.2010.06.012
- Roncero, C., Sanchez-Diaz, A. and Valdivieso, M. H. (2016). *9 Chitin Synthesis and Fungal Cell Morphogenesis*, pp. 167-190. Springer International Publishing.
- Saksela, K. and Pemi, P. (2012). SH3 domain ligand binding: what's the consensus and where's the specificity? *FEBS Lett.* **586**, 2609-2614. doi:10.1016/j.febslet.2012.04.042
- Sanchez-Diaz, A., Marchesi, V., Murray, S., Jones, R., Pereira, G., Edmondson, R., Allen, T. and Labib, K. (2008). Inn1 couples contraction of the actomyosin ring to membrane ingression during cytokinesis in budding yeast. *Nat. Cell Biol.* **10**, 395-406. doi:10.1038/ncb1701
- Sburlati, A. and Cabib, E. (1986). Chitin synthetase 2, a presumptive participant in septum formation in *Saccharomyces cerevisiae*. *J. Biol. Chem.* **261**, 15147-15152. doi:10.1016/S0021-9258(18)66844-9
- Schmidt, M., Bowers, B., Varma, A., Roh, D. H. and Cabib, E. (2002). In budding yeast, contraction of the actomyosin ring and formation of the primary septum at cytokinesis depend on each other. *J. Cell Sci.* **115**, 293-302. doi:10.1242/jcs.115.2.293
- Schneider, C. A., Rasband, W. S. and Eliceiri, K. W. (2012). NIH Image to ImageJ: 25 years of image analysis. *Nat. Methods* **9**, 671-675. doi:10.1038/nmeth.2089
- Shaner, N. C., Lambert, G. G., Chamma, A., Ni, Y., Cranfill, P. J., Baird, M. A., Sell, B. R., Allen, J. R., Day, R. N., Israelsson, M. et al. (2013). A bright monomeric green fluorescent protein derived from *Branchiostoma lanceolatum*. *Nat. Methods* **10**, 407-409. doi:10.1038/nmeth.2413
- Shaw, J. A., Mol, P. C., Bowers, B., Silverman, S. J., Valdivieso, M. H., Duran, A. and Cabib, E. (1991). The function of chitin synthases 2 and 3 in the *Saccharomyces cerevisiae* cell cycle. *J. Cell Biol.* **114**, 111-123. doi:10.1083/jcb.114.1.111
- Sietsma, J. H. and Wessels, J. G. (1990). The occurrence of glucosaminoglycan in the wall of *Schizosaccharomyces pombe*. *J. Gen. Microbiol.* **136**, 2261-2265. doi:10.1099/00221287-136-11-2261
- Silverman, S. J., Sburlati, A., Slater, M. L. and Cabib, E. (1988). Chitin synthase 2 is essential for septum formation and cell division in *Saccharomyces cerevisiae*. *Proc. Natl. Acad. Sci. USA* **85**, 4735-4739. doi:10.1073/pnas.85.13.4735
- Willet, A. H., Mcdonald, N. A., Bohnert, K. A., Baird, M. A., Allen, J. R., Davidson, M. W. and Gould, K. L. (2015). The F-BAR Cdc15 promotes contractile ring formation through the direct recruitment of the formin Cdc12. *J. Cell Biol.* **208**, 391-399. doi:10.1083/jcb.201411097
- Wloka, C. and Bi, E. (2012). Mechanisms of cytokinesis in budding yeast. *Cytoskeleton* **69**, 710-726. doi:10.1002/cm.21046
